# Supplementary material for: Superiority of Mild Interventions against COVID-19 on Public Health and Economic Measures
Source: MDPI journal article supplement (doi:10.3390/jpm11080719), 2021-07-26
Supplement: s1 [file s1]

## Supplementary Materials

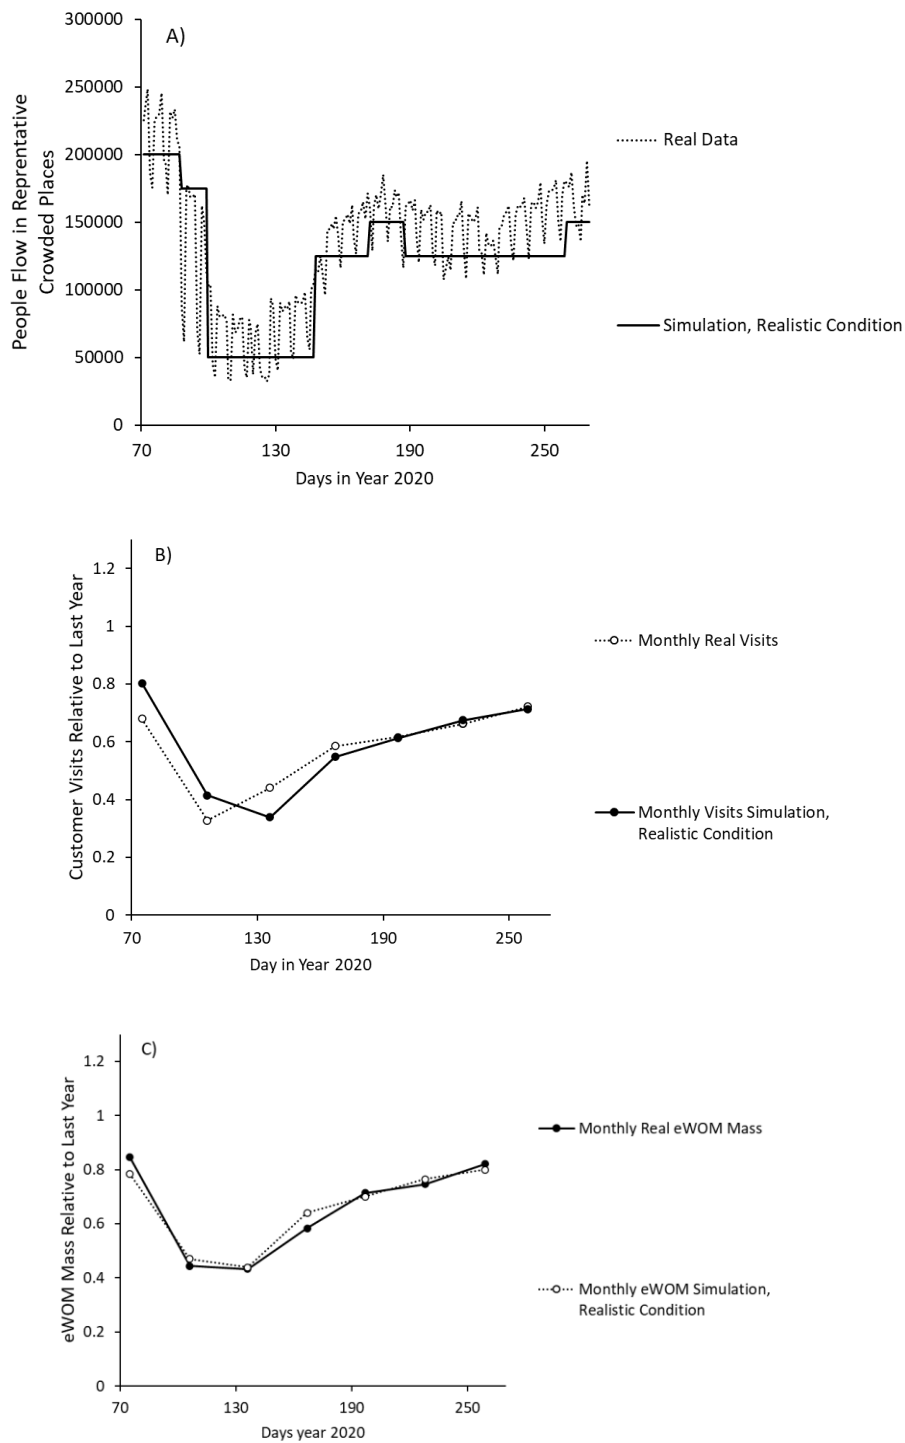

Figure S1. Simulation outcomes for (A) people flow, (B) people dining out, and (C) eWOM mass compared to real metrics.

Table S1. Parametrisation of quantitative model

| Parameter                                     | Meaning                                                                     | Initial value      | Equations                                                                                                                                                             | Comments                                                                                                                         |
|-----------------------------------------------|-----------------------------------------------------------------------------|--------------------|-----------------------------------------------------------------------------------------------------------------------------------------------------------------------|----------------------------------------------------------------------------------------------------------------------------------|
| Disease Spreading Part                        |                                                                             |                    |                                                                                                                                                                       |                                                                                                                                  |
| Susceptible                                   | Susceptible (not immunised) people                                          | $1.40 \times 10^7$ | -Infection                                                                                                                                                            | Whole Tokyo metropolitan population                                                                                              |
| Infected                                      | People newly infected on a given day                                        | 149                | infection-apparent Infection-inapparent infection                                                                                                                     | Initial value: calculated from actual confirmed positives after incubation period, apparent ratio, and testing policy            |
| Apparent                                      | People who newly appeared to be symptomatic                                 | 60                 | apparent Infection-not tested-virus testing symptomatic                                                                                                               | Initial value: calculated from actual confirmed positives and testing policy                                                     |
| Inapparent                                    | People inapparently infected and acting as virus carriers                   | 664                | inapparent infection-inapparent recovery                                                                                                                              | Initial value: calculated from actual confirmed positives, apparent ratio, and testing policy                                    |
| Confirmed positives                           | People tested and confirmed as positive                                     | 5                  | virus testing symptomatic-hospitalisation                                                                                                                             | Initial value: actual confirmed positives                                                                                        |
| Not tested positives                          | People who are symptomatic and treated at home but not virus tested         | 50                 | not tested-not tested recovery                                                                                                                                        | Initial value: calculated from actual confirmed positives and testing policy                                                     |
| Susceptible ratio                             | Effect of probability for a carrier to meet susceptible people              | -                  | $\text{Susceptible}/1.40 \times 10^7$                                                                                                                                 | -                                                                                                                                |
| Reproduction rate                             | Standard reproduction rate (2.9 / occasion) calibrated to a unit time (day) | 0.207              | -                                                                                                                                                                     | 2.9: median of reported $R_0$ [16]                                                                                               |
| Temperature effect                            | Transmission affected by wet bulb temperature [18]                          | 1.0                | 15 May 2020: 1.2<br>15 Jun 2020: 1.6<br>15 Jul 2020: 1.1<br>15 Sep 2020: 1.6                                                                                          | Monthly average temperature was used                                                                                             |
| Apparent ratio                                | Apparent ratio                                                              | 0.375              | -                                                                                                                                                                     | [17]                                                                                                                             |
| Incubation time                               | Incubation time                                                             | 5                  | -                                                                                                                                                                     | [17]                                                                                                                             |
| Apparent infection                            | Daily apparent infections                                                   | -                  | Infected*apparent ratio/incubation time                                                                                                                               | -                                                                                                                                |
| Inapparent infection                          | Daily inapparent infections                                                 | -                  | Infected*(1-apparent ratio)/incubation time                                                                                                                           | -                                                                                                                                |
| Inapparent virus clearance period             | Virus clearance period in inapparent infection                              | 8                  | -                                                                                                                                                                     | Tentative turnover 14 days minus infection day and incubation period                                                             |
| Testing policy                                | Initially, testing frequency was limited                                    | 0.5                | Raised to 1.0 after 10 May 2020                                                                                                                                       | Half of the fevers are early onset [18]                                                                                          |
| People Flow and Behavior Part                 |                                                                             |                    |                                                                                                                                                                       |                                                                                                                                  |
| Baseline People Flow                          | Baseline in representative crowded place                                    | 250000             | -                                                                                                                                                                     | 250,000 per representative traffic node                                                                                          |
| Daily Maximum People Flow                     | Maximum people flow in crowded places represented by station                | 0                  | Baseline People Flow*(1-0.2 x school closure commuting effect-0.1 x stay-at-home request -0.1 x short-term epidemic consciousness - 0.4 x new normal lifestyle effect | -                                                                                                                                |
| Behaviour guidance                            | Exclusive guidance from Government                                          | 0                  | 15 Apr 2020: 1                                                                                                                                                        | Recognition at this time point was suggested by LINE survey [31]                                                                 |
| Distancing and protective behaviour facto     | Reduced risk by individual protective behaviour (wearing masks, distancing) | 0.5                | -                                                                                                                                                                     | [15]                                                                                                                             |
| Protective behaviour under epidemic condition | Probability for each person to act ideal protective behaviour               | 0.6                | -                                                                                                                                                                     | Estimated from the finding that about 60% of survey respondents thought more stringent measures were necessary in June 2020 [15] |

|                                             |                                                                             |                    |                                                                                                                                                                                                                  |                                                                                    |
|---------------------------------------------|-----------------------------------------------------------------------------|--------------------|------------------------------------------------------------------------------------------------------------------------------------------------------------------------------------------------------------------|------------------------------------------------------------------------------------|
| Protective behaviour under normal condition | Probability for each person to act according to ideal protective behaviours | 0.3                | -                                                                                                                                                                                                                | Half probability of epidemic condition                                             |
| Restaurant Industry Part                    |                                                                             |                    |                                                                                                                                                                                                                  |                                                                                    |
| Customer Staying home                       | Potential customer staying home                                             | $1.07 \times 10^7$ | dining out to home-dining out                                                                                                                                                                                    | Initial value: population of Tokyo consisting of individuals 15 to 74 years of age |
| Customer Dining Out                         | Customer dining out                                                         | 0                  | dining out-dining out to home                                                                                                                                                                                    | -                                                                                  |
| Dining Out                                  | Movement to dining out                                                      | 0                  | baseline dining out x (1-0.2 x school-closure psychological effect-0.1 x stay-at-home request -0.1 x mid-term epidemic consciousness -0.1 x focused intervention effect -0.3 x long-term epidemic consciousness) | -                                                                                  |
| eWOM Mass                                   | Relative daily eWOM mass                                                    | 0                  | (1-0.2 x school-closure psychological effect -0.2 x long-term epidemic consciousness - 0.1 x stay-at-home request -0.1 x focused intervention effect - 0.1 x mid-term epidemic consciousness)                    | -                                                                                  |

Table S2. Parametrisation in each intervention scenario

| Parameter                               | Realistic      | Second Emergency | Pre-Emptive Shorter<br>Emergency | Exhaustive Emergency |
|-----------------------------------------|----------------|------------------|----------------------------------|----------------------|
| Short-term epidemic<br>consciousness    | Initial: 0     | Initial: 0       | Initial: 0                       | Initial: 0           |
|                                         | 27 Mar 2020: 1 | 27 Mar 2020: 1   | 27 Mar 2020: 1                   | 27 Mar 2020: 1       |
|                                         | 30 May 2020: 0 | 30 May 2020: 0   | 30 May 2020: 0                   | 30 May 2020: 0       |
|                                         | 05 Jul 2020: 1 | 05 Jul 2020: 1   | 28 Jun 2020: 1                   | 03 Jul 2020: 1       |
|                                         | 15 Sep 2020: 0 | 01 Sep 2020: 0   | 28 Jul 2020: 0                   | 01 Sep 2020: 0       |
| Mid-term epidemic<br>consciousness      | Initial: 0     | Initial: 0       | Initial: 0                       | Initial: 0           |
|                                         | 27 Mar 2020: 1 | 27 Mar 2020: 1   | 27 Mar 2020: 1                   | 27 Mar 2020: 1       |
|                                         | 30 May 2020: 0 | 30 May 2020: 0   | 30 May 2020: 0                   | 30 May 2020: 0       |
| Long-term epidemic<br>consciousness     | Initial: 0     | Initial: 0       | Initial: 0                       | Initial: 0           |
|                                         | 27 Mar 2020: 1 | 27 Mar 2020: 1   | 27 Mar 2020: 1                   | 27 Mar 2020: 1       |
| School closure,<br>psychological effect | Initial: 1     | Initial: 1       | Initial: 1                       | Initial: 1           |
|                                         | 26 May 2020: 0 | 26 May 2020: 0   | 26 May 2020: 0                   | 26 May 2020: 0       |
| Stay-at-home request                    | Initial: 0     | Initial: 0       | Initial: 0                       | Initial: 0           |
|                                         | 08 Apr 2020: 1 | 08 Apr 2020: 1   | 08 Apr 2020: 1                   | 29 Mar 2020: 1       |
|                                         | 26 May 2020: 0 | 26 May 2020: 0   | 26 May 2020: 0                   | 30 May 2020: 0       |
|                                         |                | 19 Jul 2020: 1   | 28 Jun 2020: 1                   | 03 Jun 2020: 1       |
|                                         |                | 01 Sep 2020 :0   | 28 Jul 2020: 0                   | 01 Sep 2020: 0       |
